1                   **Computational dissociation of**  
2                   **dopaminergic and cholinergic effects**  
3                   **on action selection and inhibitory**  
4                   **control**

---

5

6

7 *Eduardo A. Aponte<sup>1</sup>, Dario Schöbi<sup>1</sup>, Klaas E. Stephan<sup>1,2,3</sup>, Jakob Heinzle<sup>1</sup>*

8     <sup>1</sup>Translational Neuromodeling Unit, Institute for Biomedical Engineering,  
9     University of Zurich & ETH Zurich, Wilfriedstrasse 6, 8002, Zurich,  
10    Switzerland.

11    <sup>2</sup>Wellcome Centre for Human Neuroimaging, University College London. 12  
12    Queen Square, London, WC1N, 3AR, UK.

13    <sup>3</sup> Max Planck Institute for Metabolism Research, Gleueler Strasse 50, 50931  
14    Cologne, Germany.

15

16    \* **Corresponding authors:**

17    Eduardo A. Aponte; Address: Wilfriedstrasse 6, 8002, Zurich, Switzerland; Tel.:  
18    +41446349112; Email: [aponte@biomed.ee.ethz.ch](mailto:aponte@biomed.ee.ethz.ch) .

19    [Jakob](#) Heinzle; Address: Wilfriedstrasse 6, 8002, Zurich, Switzerland; Tel.:  
20    +41446349122; Email: [heinzle@biomed.ee.ethz.ch](mailto:heinzle@biomed.ee.ethz.ch)

21

22

## 23 **Abstract**

### 24 *Background*

25 Patients with schizophrenia make more errors than healthy subjects on the  
26 antisaccade task. In this paradigm, participants are required to inhibit a reflexive  
27 saccade to a target and to select the correct action (a saccade in the opposite  
28 direction). While the precise origin of this deficit is not clear, it has been  
29 connected to aberrant dopaminergic and cholinergic neuromodulation.

### 30 *Methods*

31 To study the impact of dopamine and acetylcholine on inhibitory control and  
32 action selection, we administered two selective drugs (levodopa  
33 200mg/galantamine 8mg) to healthy volunteers (N=100) performing the  
34 antisaccade task. A computational model (SERIA) was employed to separate the  
35 contribution of inhibitory control and action selection to empirical reaction times  
36 and error rates.

### 37 *Results*

38 Modeling suggested that levodopa improved action selection (at the cost of  
39 increased reaction times) but did not have a significant effect on inhibitory  
40 control. By contrast, according to our model, galantamine affected inhibitory  
41 control in a dose dependent fashion, reducing inhibition failures at low doses and  
42 increasing them at higher levels. These effects were sufficiently specific that the  
43 computational analysis allowed for identifying the drug administered to an  
44 individual with 70% accuracy.

### 45 *Conclusions*

46 Our results do not support the hypothesis that elevated tonic dopamine strongly  
47 impairs inhibitory control. Rather levodopa improved the ability to select correct  
48 actions. Instead, inhibitory control was modulated by cholinergic drugs. This  
49 approach may provide a starting point for future computational assays that  
50 differentiate neuromodulatory abnormalities in heterogeneous diseases like  
51 schizophrenia.

52

## 53 **Introduction**

54 Schizophrenia is a heterogeneous clinical entity: patients with comparable  
55 symptoms show highly variable treatment responses and clinical trajectories over  
56 time (1; 2). A key challenge is to devise procedures for differential diagnostics  
57 that disambiguate potential disease mechanisms and inform individualized  
58 treatment (3). One proposal derives from the “dysconnection hypothesis” which  
59 posits that the schizophrenia spectrum consists of different abnormalities in  
60 dopaminergic and cholinergic modulation of NMDA receptor dependent  
61 plasticity (4-6). This suggests the development of assays of neuromodulation that  
62 can operate on individualized clinical data.

63 Eye movements are attractive targets in this regard (7). They (*i*) can be easily  
64 measured in clinical settings, (*ii*) are sensitive to changes in neuromodulation,  
65 and (*iii*) display abnormalities in schizophrenia. Saliently, it has been  
66 consistently reported that patients with schizophrenia make more errors than  
67 control participants in the antisaccade task (8-11). In this paradigm, subjects are  
68 required to saccade in the opposite direction of a visual cue. This is assumed to  
69 probe participants’ ability to inhibit a reflexive (pro)saccade towards the cue and  
70 to select and initiate the correct action, i.e., an (anti)saccade in the opposite  
71 direction (8). However, it remains unclear whether the elevated error rate (ER)  
72 in schizophrenia is caused by deficits in inhibitory control of reflexive  
73 prosaccades, in selecting correct actions (antisaccades), or by a combination of  
74 these factors.

75 All of these options are thought to be related to abnormal neuromodulation.  
76 Specifically, aberrant tonic dopamine (DA) levels in the basal ganglia (BG) could  
77 lead to abnormalities in the ‘NO GO’ pathway responsible for the inhibition of  
78 reflexive saccades (9-12). However, other DA-dependent mechanisms are  
79 conceivable. For example, the findings that (a) lesions in the BG do not affect  
80 antisaccade performance (13), but (b) prefrontal lesions critically impair it (14;  
81 15), challenge the view that higher ER in schizophrenia is caused exclusively by  
82 impaired inhibitory control (16; 17). Instead, higher ER may be caused by DA-  
83 dependent processes related to selecting the correct action, e.g., aberrant  
84 prefrontal task set maintenance (17).

85 In contrast to the conjectured effect of elevated basal tonic DA, pro-cholinergic  
86 drugs targeting nicotinic receptors have been postulated as possible treatments  
87 for negative symptoms and cognitive impairments in schizophrenia (18-20).  
88 While results from clinical studies have been mixed (21-24), several studies have  
89 specifically investigated whether nicotine impacts antisaccade performance (25-

90 34). These reports indicate that nicotine reduces ER (26; 29; 30; 33; 35)  
91 although see (34).

92 Muscarinic receptors might also be important for the antisaccade task. Indeed,  
93 the BG are rich in muscarinic receptors and receive strong cholinergic projections  
94 (36). Moreover, ACh has been suggested to play a role in the inhibition of  
95 reflexive actions towards salient stimuli (37). According to this theory,  
96 cholinergic interneurons in the striatum transiently enhance the response of the  
97 'NO GO' pathway when a stimulus is suddenly presented. Thus, it is plausible  
98 that ACh regulates the inhibition of reflexive saccades during the antisaccade  
99 task.

100 In summary, the effects of pro-cholinergic and pro-dopaminergic drugs on the  
101 antisaccade task are not fully understood. The goal of the present study was  
102 twofold. First, we investigated the effects of pro-dopaminergic and pro-  
103 cholinergic drugs (levodopa/galantamine) on inhibitory control and action  
104 selection in the antisaccade task. Second, we asked whether these effects were  
105 specific enough to infer, based on computational modeling of antisaccade  
106 performance, which drug had been administered to a given subject. This would  
107 establish the plausibility of an assay of dopaminergic and cholinergic  
108 neuromodulation based on the antisaccade task.

109 To address these questions, we performed two twin experiments following a  
110 double-blind, placebo-controlled, between-group design. To uncover the effects  
111 of levodopa and galantamine on antisaccades, we used the *Stochastic Early*  
112 *Reaction, Inhibition and late Action* (SERIA) model (38-40), a recent  
113 computational model of antisaccade mechanisms that quantifies the contribution  
114 of inhibitory control and action selection to ER and RT. In addition, we  
115 investigated whether the parameters inferred by the model were predictive of the  
116 drug administered to individual participants. For this, we combined SERIA with  
117 a machine learning algorithm to predict the drug applied on a subject-by-subject  
118 basis. A successful prediction would speak to the translational potential of SERIA  
119 as a computational assay of dopaminergic and cholinergic neuromodulation  
120 (41).

## 121 **Methods**

### 122 **Experiment and Apparatus**

123 All procedures described here were approved by the Cantonal Ethics Committee  
124 Zurich (KEK-ZH-Nr.2014-0246). The placebo data from Exp. 1 were used in a  
125 previous study (42).

#### 126 *Participants*

127 Participants were approached through the recruitment system of the University  
128 of Zurich. During the first visit, subjects provided written informed consent, and  
129 medical and demographic information. Only male participants were recruited  
130 due to interactions between the menstrual cycle and dopaminergic medication  
131 (43). Subjects who fulfilled all inclusion criteria (cf. Supp. 1) were invited to two  
132 experimental sessions separated by one to eight weeks.

#### 133 *Pharmacology*

134 Two drugs were used: levodopa and galantamine. Levodopa is a precursor of DA  
135 that crosses the blood-brain barrier and increases the presynaptic availability of  
136 DA (44). Galantamine is an acetylcholinesterase inhibitor, that increases the  
137 availability of ACh at the synaptic cleft, and an allosteric potentiating ligand of  
138 the  $\alpha 7$  (45) and  $\alpha 4\beta 2$  ACh nicotinic receptors (46-48).

#### 139 *Experimental procedure*

140 At the beginning of each session, participants were orally administered color and  
141 shape matched capsules containing either Madopar® DR 250g (200mg levodopa,  
142 50mg benserazide) or lactose (Exp. 1), or Reminyl® (8mg galantamine) or  
143 lactose (Exp. 2). Both experimenters and participants were blind to the drug  
144 administered. Subsequently, participants received written instructions regarding  
145 the experiment and participated in a training that lasted 20 to 30 minutes.

146 Testing started 70 minutes after drug administration. This delay was chosen to  
147 allowed both compounds to reach peak plasma levels (Madopar: 0.7h (49),  
148 Reminyl: 0.8-2h (50)). Furthermore, the half-life of levodopa is close to 1.5h  
149 (49), whereas galantamine's half-life is 5.2h (50), and thus much longer than the  
150 mean duration of the experiment (30min).

#### 151 *Task design*

152 Fig. 1A depicts the task procedure. A complete description can be found in (42)  
153 and in Supp. 2.

154

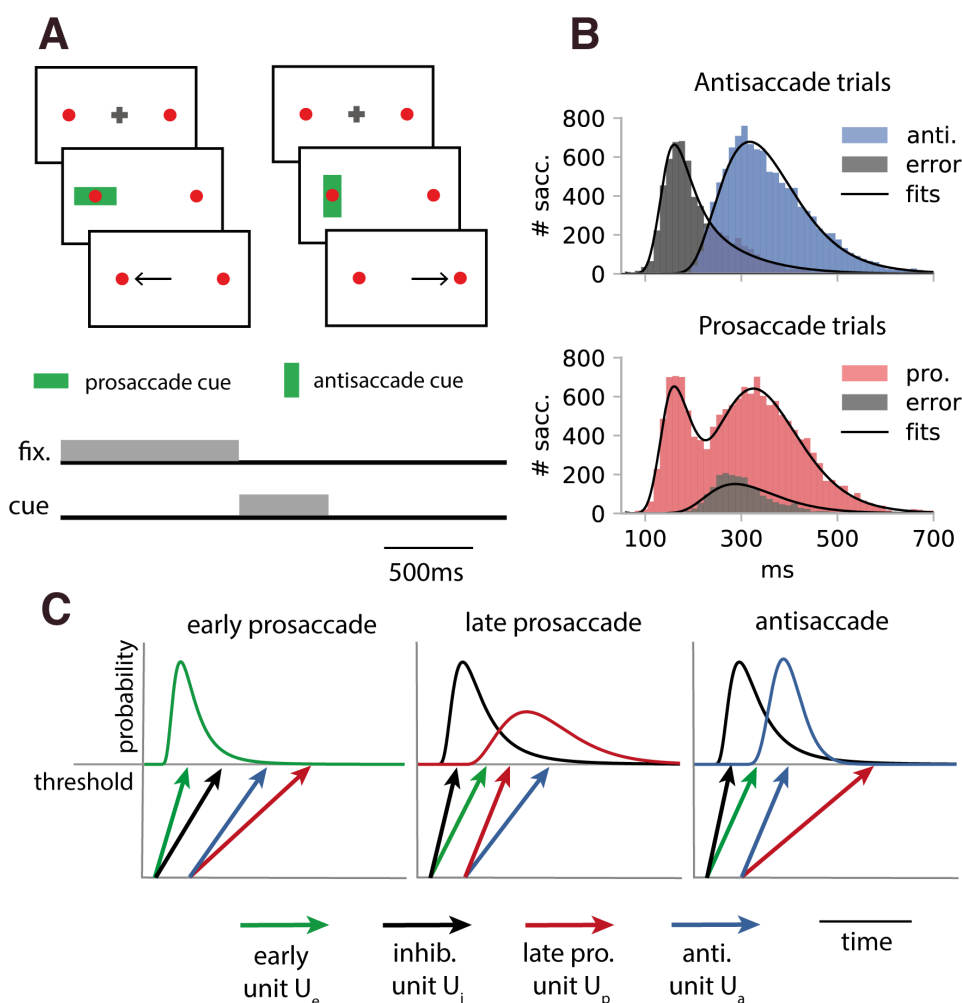

**Figure 1:** **A.** Task design: Two red circles were presented at  $12^\circ$  to the right and left of the center of the screen. Each trial started with a fixation cross for 500 to 1000ms. After the fixation period, a green bar was displayed for 500ms centered on one of two peripheral red circles. Participants were required to saccade to a cued red circle (prosaccade trials) or to saccade in the uncued direction (antisaccade trials) as fast as possible. **B.** RT histogram and model fits of all subjects in a subset of the data (PP50 condition). Top panel: Antisaccade trials. Correct antisaccades are displayed in blue. Errors in gray. Bottom panel: Prosaccade trials. Correct prosaccades are displayed in red. Errors in gray. Note that prosaccades were bimodally distributed. The first peak corresponds to reflexive (early) prosaccades, whereas the second peak corresponds to voluntary (late) prosaccades. The RT distributions predicted by the model are displayed in black. **C.** Schematic presentation of the model. SERIA uses four race-to-threshold units. The early unit (green) triggers fast prosaccades. If the inhibitory unit (black) hits threshold before the early unit, voluntary prosaccades (red) or antisaccades (blue) can be generated. Modified with permission from (39).

155 The main experiment consisted of three blocks of 192 trials. Every block  
 156 contained randomly interleaved pro- and antisaccade trials, of which 20, 50 or

157 80% were prosaccade trials (conditions PP20, PP50, PP80 respectively). The  
158 order of the blocks was identical in both sessions, but pseudo-randomized across  
159 subjects.

## 160 **Modeling**

161 The first main goal of this study was to quantify the effects of levodopa and  
162 galantamine on inhibitory control and action selection. The key observation here  
163 is that to complete an antisaccade, two things need to happen. First, a reflexive  
164 saccade to the peripheral cue must be stopped. Second, participants need to  
165 apply the rule associated with the cue (*vertical bar = antisaccade*) to select the  
166 corresponding action (a saccade in the direction opposite to the cue). These steps  
167 allow for different types of error: either a reflexive prosaccade is not stopped (an  
168 inhibition failure), or the wrong action is selected (a choice error).

169 In the case of correct prosaccades, a similar process takes place with an important  
170 twist: inhibition failures are correct responses on prosaccade trials. However,  
171 when reflexive saccades are stopped, subjects still need to select the correct  
172 action associated with the cue (*horizontal bar = prosaccade*). When the wrong  
173 action is selected, an (error) antisaccade is generated.

174 To quantify the effects of levodopa and galantamine on inhibitory control and  
175 action selection, it is therefore necessary to disentangle when subjects fail to  
176 inhibit reflexive prosaccades (inhibition failures), and when they fail to select the  
177 correct action (choice errors). Because none of these can be directly measured,  
178 we fitted the SERIA model to individual RT distributions (Fig. 1B-C and Supp 3).

179 In brief, SERIA asserts that saccades are the result of the competition between  
180 four race-to-threshold processes or units (see Fig. 1C and (39; 42)): an early  
181 response unit  $U_e$  associated with fast prosaccades, an inhibitory unit  $U_i$  whose  
182 function is to stop fast prosaccades, and two late response units that represent  
183 voluntary (late) prosaccades ( $U_p$ ) and antisaccades ( $U_a$ ). Conceptually, SERIA  
184 postulates that early or reflexive prosaccades are generated when the early unit  
185 is not stopped by the inhibitory unit. In addition, when a fast prosaccade is  
186 stopped, a voluntary eye movement is generated. The action selected  
187 (antisaccade or late prosaccade) is determined by the late unit that hits threshold  
188 first.

189 The model can be used to infer on several quantities that are not directly  
190 measurable. First, SERIA's parameters capture the probability of an inhibition  
191 failure, i.e., the probability that the early unit hits threshold before all other units.  
192 Second, it is possible to quantify the mean hit time of the late units. For



193 antisaccades, this quantity is similar to the mean RT. For prosaccades, this  
194 quantity represents the RT of voluntary (late) prosaccades. Finally, the  
195 parameters of the model determine the probability of choice errors. On an  
196 antisaccade trial, a choice error is a voluntary prosaccade. By contrast, on a  
197 prosaccade trial, an error antisaccade is generated when the antisaccade unit hits  
198 threshold before the late prosaccade unit.

199 Details about the modeling approach and fitting procedure can be found in Supp  
200 3.

### 201 *Statistical analysis*

202 Statistical analyses were conducted using generalized linear mixed effect models  
203 (GLME) implemented in *R* (3.4.3). Subjects were entered as a random effect,  
204 whereas the factors *switch trial* (SWITCH), *prosaccade trial probability* (PP),  
205 SESSION, DRUG (drug vs. placebo), *experiment* (EXP, dopamine vs.  
206 galantamine), and DOSE defined as  $drug(mg)/weight(kg)$ , were treated as fixed  
207 effects. In addition, we considered the following interactions PP\*SESSION,  
208 PP\*SWITCH, PP\*DRUG, DOSE\*DRUG. When both experiments were analyzed  
209 together, we also included the interactions DRUG\*EXP, DRUG\*DOSE\*EXP and  
210 DRUG\*PP\*EXP. ER were analyzed with binomial regression models, whereas  
211 probabilities were analyzed with Beta regression models. Statistical inference  
212 about RT were based on *F*-tests. For ER and probabilities, Wald tests were  
213 employed. Significance was asserted at  $\alpha = 0.05$ .

### 214 *Classification*

215 The second main goal of this study was to test whether it is possible to determine  
216 if a given participant received levodopa or galantamine based on computational  
217 parameters derived from our model. To this end, a supervised classification  
218 algorithm was trained on individual model-based features computed from  
219 parameter estimates, with the aim to predict the drug administered on a subject-  
220 by-subject basis. More concretely, the features used to train the classifier were  
221 subject-specific differences in parameter estimates between the drug and placebo  
222 conditions. This “generative embedding” (51) strategy is a way to enhance  
223 (un)supervised learning by using posterior estimates from a generative model,  
224 instead of raw data, as a denoised and low-dimensional feature space.  
225 Classification was performed using *gradient boosting* (52) implemented in  
226 *xgboost* (53). The details of the classification strategy are explained in Supp. 4.  
227



## 228 **Results**

### 229 **Participants**

230 In Exp. 1, 46 subjects (mean age 23.6, std. 2.9) were included in the final  
231 analysis. In Exp. 2, 44 subjects were included in the final analysis (mean age  
232 22.4, std. 2.3). For further details see Supp. 5.

### 233 **Error rate and reaction time**

234 Before analyzing the behavioral data with SERIA, we report the empirical ER and  
235 RT. The former is assumed to measure participants' ability to stop reflexive  
236 prosaccades, and therefore elevated ER is thought to reflect poor inhibitory  
237 control (8). There is less consensus on what changes in RT may indicate (56; 57).  
238 For example, RT is thought to represent attentional shifting velocity (54) and  
239 saccadic processing velocity (58). An extended overview of behavioral effects is  
240 presented in Supp. 6 and 7.

#### 241 *Error rate*

242 The mean ER on pro- and antisaccade trials is displayed in Fig. 2 top row. High  
243 congruent trial type probability was associated with fewer errors on pro- ( $p <$   
244  $10^{-5}$ ) and antisaccade trials ( $p < 10^{-5}$ ). For example, participants made fewer  
245 prosaccade errors (antisaccades) when prosaccade trials were most common  
246 (PP80 block), compared to other blocks (PP20 and PP50).

#### 247 *Error rate - drug effects*

248 Levodopa reduced the ER on prosaccade trials ( $p = 0.010$ ). This effect was dose  
249 dependent ( $p = 0.004$ ). On antisaccade trials, we found no significant main  
250 effect of DRUG in Exp. 1 or 2, but there was a significant interaction between  
251 DRUG and DOSE in Exp. 2 ( $p < 10^{-5}$ ). Galantamine increased antisaccade ER at  
252 high doses, while it reduced it at more moderate levels.

#### 253 *Reaction time*

254 RT on correct trials were analyzed similarly to ER (Fig. 2 bottom row). Higher  
255 congruent trial type probability led to lower RT in both pro- ( $p < 10^{-5}$ ) and  
256 antisaccade trials ( $p < 10^{-5}$ ).

#### 257 *Reaction times - drug effects*

258 Levodopa increased the latency of antisaccades compared to galantamine (Fig.  
259 2H;  $p < 10^{-3}$ ). When the two experiments were analyzed independently, we

260 found that galantamine decreased antisaccade RT ( $p < 10^{-3}$ ). No other effect  
 261 was significant.

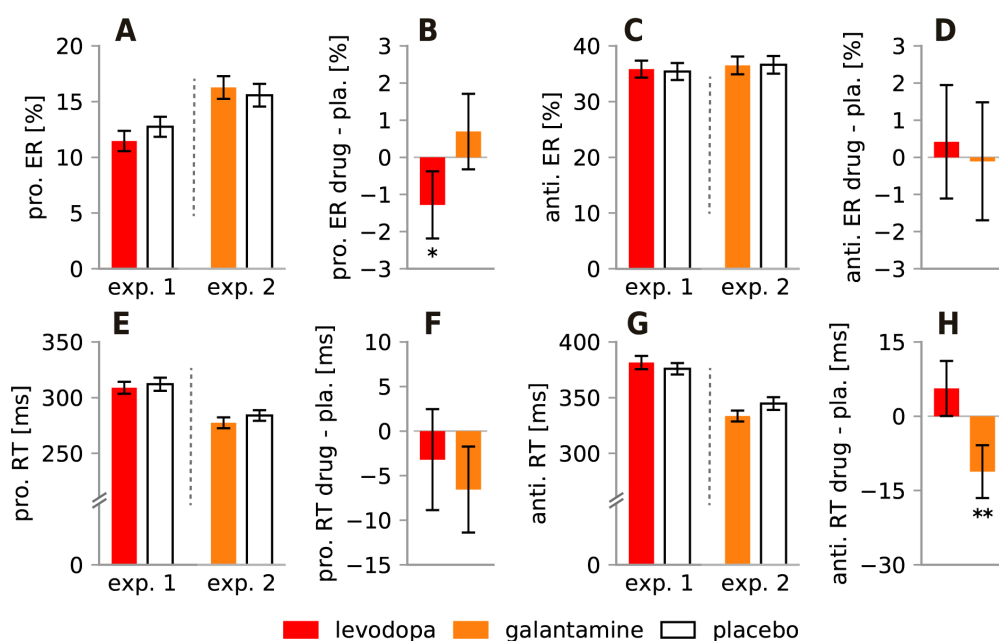

**Figure 2:** A. Mean prosaccade ER in Exp. 1 and 2. B. Difference in prosaccade ER between the drug and placebo conditions. Levodopa significantly reduced prosaccade ER ( $p = 0.010$ ). C. Mean antisaccade ER. D. Difference in antisaccade ER between the drug and placebo conditions. E. Mean prosaccade RT in Exp. 1 and 2. F. Difference in prosaccade RT between the drug and placebo conditions. G. Mean antisaccade RT. H. Difference in antisaccade RT between the drug and placebo conditions. Galantamine decreased antisaccade RT ( $p < 10^{-3}$ ). Error bars depict the SEM. PP: prosaccade trial probability; \* :  $p < 0.05$ ; \*\* :  $p < 0.01$ .

## 262 Modeling

263 The classical behavioral analysis revealed three drug related effects: (i) Levodopa  
 264 reduced the ER on prosaccade trials, (ii) galantamine reduced antisaccade  
 265 latency and (iii) increased the antisaccade ER in a dose dependent fashion. In  
 266 order to relate the behavioral findings to inhibitory control or action selection,  
 267 we applied computational modeling to our behavioral data. Our main goal was  
 268 to determine whether levodopa and galantamine affected (i) the hit time of the  
 269 inhibitory and late units, (ii) the probability of inhibition failures (inhibitory  
 270 control), and (iii) the probability of choice errors (action selection). Drug effects  
 271 on the hit times of the inhibitory or late units would demonstrate effects specific  
 272 to either inhibitory control or action selection.

273 *Threshold hit times*

274 The hit times of the inhibitory, and late pro- and antisaccade units were analyzed  
275 as in the previous section. Contrary to raw RT, these can be imputed directly to  
276 the inhibition of reflexive prosaccades or to voluntary actions. For the late units,  
277 we report the expected hit times on correct trials. In the case of the inhibitory  
278 unit, pro- and antisaccade trials were analyzed together.

279 In agreement with (39; 42), we found that the hit time of the inhibitory unit  
280 increased with the frequency of prosaccade trials ( $p < 10^{-3}$ ), indicating reduced  
281 inhibition when prosaccade trials were more common.

282 *Threshold hit times – Drug effects*

283 Levodopa increased the latency of voluntary actions (Fig. 3A-B; late pro.  $p =$   
284 0.004; anti.  $p = 0.010$ ). On average, voluntary saccades were 5ms slower under  
285 levodopa than under placebo, which correspond to small effect sizes (Cohen's  $f^2$   
286 *pro.*: 1.29, *anti.*: 1.11). However, although similar in magnitude, the effect of  
287 levodopa on the inhibitory unit failed to reach significance (*drug – placebo* =  
288 5ms,  $f^2 = 0.07$ ,  $p = 0.079$ ).

289 Galantamine had the opposite effect of levodopa on voluntary actions.  
290 Specifically, it reduced the hit time of late pro- ( $p < 10^{-3}$ ) and antisaccades ( $p =$   
291 0.001). On average, the hit times were 6ms lower under galantamine compared  
292 to placebo, which constitute medium effect sizes (*pro.*:  $f^2 = 1.82$ ; *anti.*  $f^2 =$   
293 1.52). Again, there was no main effect of DRUG on the inhibitory unit ( $p = 0.382$ )  
294 but there was a dose dependent effect as explained later on.

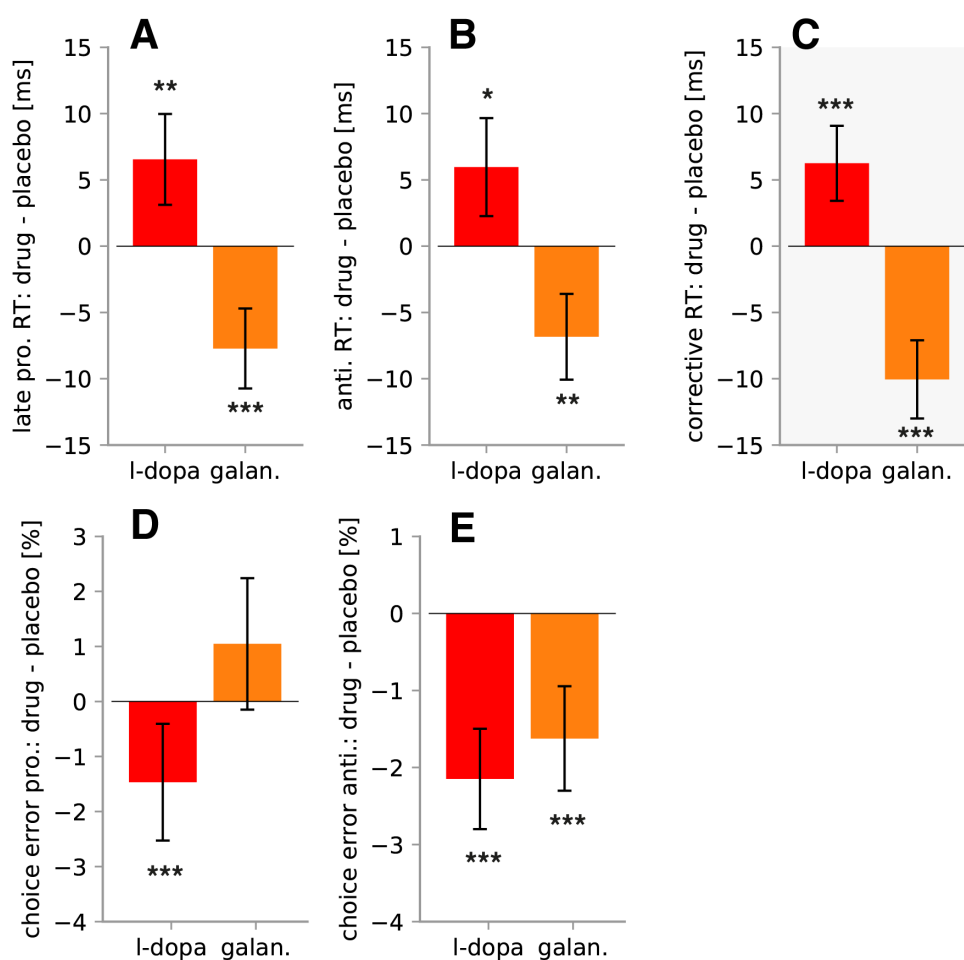

**Figure 3:** **A.** Difference in RT of late prosaccades between drug and placebo conditions ( $p < 10^{-3}$ ). **B.** Difference in RT of antisaccades ( $p < 10^{-3}$ ). **C.** Difference in RT of corrective antisaccades ( $p < 10^{-3}$ ). Note: The data in C (in gray) are completely independent of the modeling that led to the results in A and B. Corrective antisaccades display the same drug effects as voluntary saccades. **D.** Difference in ER in late prosaccades between the drug and placebo conditions ( $p < 10^{-5}$ ). **E.** Difference in late ER on antisaccade trials ( $p < 10^{-3}$ ). Error bars represent the SEM. \*:  $p < 0.05$ ; \*\*:  $p < 0.01$ , \*\*\*:  $p < 0.001$ .

### 295 *Corrective antisaccades*

296 In (39; 42), we showed that corrective antisaccades that follow errors on  
297 antisaccade trials are distributed like late responses up to a fixed delay.  
298 Consequently, SERIA predicts that corrective antisaccades should display the  
299 same drug effects as antisaccades, i.e., slower corrective antisaccades in the  
300 levodopa condition and faster antisaccades in the galantamine condition.

301 We analyzed 5696 corrective saccades in Exp. 1 and 4996 in Exp. 2. Because the  
302 frequency of corrective antisaccades varied widely over subjects and conditions,

303 we accounted for the inhomogeneous number of trials by analyzing trial-by-trial  
304 RT as opposed to mean RT, using a strategy similar to (55).

305 Supporting our hypothesis (Fig. 3C), levodopa increased the RT of corrective  
306 antisaccades ( $\Delta RT = 8ms$ ;  $f^2 = 1.11$ ;  $p < 10^{-3}$ ), whereas galantamine had the  
307 opposite effect ( $\Delta RT = -10ms$ ;  $f^2 = 1.52$ ;  $p < 10^{-3}$ ).

### 308 *Inhibition failures and choice errors*

309 We proceeded to investigate the probability of choice errors and inhibition  
310 failures. Choice errors occur when the incongruent voluntary action hits  
311 threshold before the congruent action. In other words, choice errors happen  
312 when the wrong voluntary action is selected. An inhibition failure occurs when  
313 the early unit hits threshold before all other units.

314 Choice error rate was anticorrelated with congruent trial type probability (late  
315 pro:  $p < 10^{-5}$ ; anti:  $p < 10^{-5}$ ). Thus, the correct voluntary action was selected  
316 most often when the probability of the corresponding trial type was the highest.  
317 The probability of an inhibition failure was positively correlated with prosaccade  
318 trial probability ( $p < 10^{-5}$ ). This indicates that inhibitory control was released as  
319 prosaccade trials became more common.

### 320 *Inhibition failures and choice errors - drug effects*

321 Levodopa significantly reduced the probability of choice errors on pro- and  
322 antisaccade trials (Fig. 3D-E; pro.:  $\Delta = 1.5\%$ ;  $p < 10^{-3}$ ; anti.:  $\Delta = 2.1\%$ ;  $p <$   
323  $10^{-5}$ ). By contrast, levodopa increased the probability of inhibition failures,  
324 although this effect was not significant ( $\Delta = 1.6\%$ ,  $p = 0.082$ ). Therefore,  
325 levodopa mainly improved the ability to select correct voluntary actions, at the  
326 cost of higher RT.

327 Galantamine decreased the probability of choice errors on antisaccade trials ( $p <$   
328  $10^{-5}$ ). On prosaccade trials, galantamine did not have a significant effect ( $p =$   
329  $0.095$ ). There was no significant main effect of galantamine on the number of  
330 inhibition failures ( $p = 0.590$ ).

### 331 *Dose dependent effects*

332 In addition to the main effects of galantamine and levodopa, we investigated any  
333 dose dependent effect. At low doses, levodopa reduced the probability of choice  
334 errors on prosaccade trials. This effect was reversed at higher doses (Fig. 4A;  $p <$   
335  $10^{-5}$ ). While the main effect of DRUG was not significant in Exp. 2, galantamine  
336 had a highly significant dose dependent effect on the latency of the inhibitory  
337 unit (Fig. 4B;  $p < 10^{-3}$ ). This was reflected by a linear effect on inhibition failure  
338 probability ( $p < 10^{-3}$ ). At low doses, galantamine reduced the hit time of the

339 inhibitory unit and the inhibition failure probability, and this effect was reversed  
340 at higher doses.

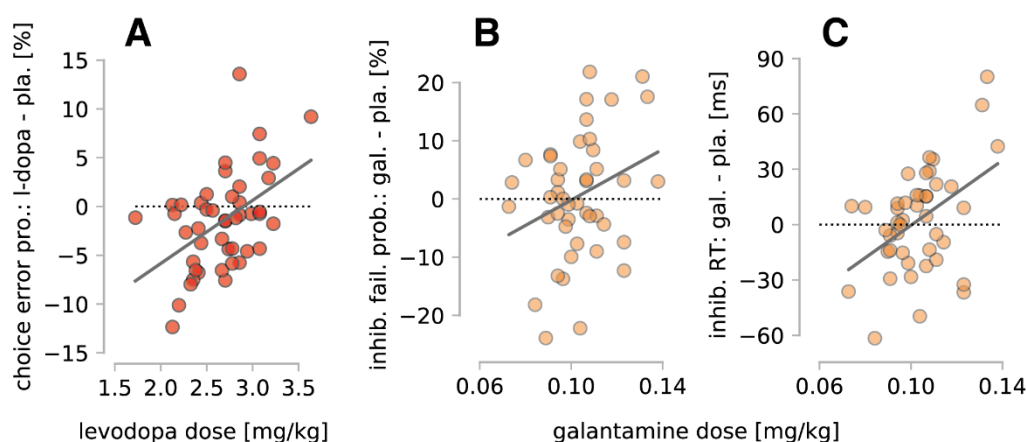

**Figure 4: Dose dependent effects.** **A.** Difference (*levodopa - placebo*) in choice ER on prosaccade trials as a function of dose in Exp. 1 ( $p < 10^{-5}$ ). At a high dose, levodopa increased the number of errors, whereas at more moderate levels, it had the opposite effect. **B.** Difference (*galantamine - placebo*) in the percentage of inhibition failures averaged across conditions. Galantamine increased the number of inhibition failures as a function of dose ( $p < 10^{-3}$ ). **C.** Difference (*galantamine - placebo*) in the RT of the inhibitory unit averaged across conditions. Galantamine increased the latency of the inhibitory unit as a function of dose ( $p < 10^{-3}$ ).

341 *Classification of drug effects*

342 Finally, we tested whether the effects of levodopa and galantamine on  
343 computational parameters can be used to predict which of the two drugs was  
344 administered (Fig. 5). Leave-one-out cross-validation resulted in 70% predictive  
345 accuracy (95% CI [61%, 79%]). A permutation test, in which the levodopa and  
346 galantamine labels were randomly swapped, showed that the predictive accuracy  
347 was highly significant ( $p < 0.001$ ). A second permutation test (in which the drug  
348 and placebo labels were randomly swapped) yielded a similar result ( $p = 0.001$ ;  
349 Fig. 5). Because drug/placebo labels (but not experiment labels) were permuted,  
350 this second test rules out that the accuracy of the classifier depended on a  
351 difference between experiments not related to the drug administered.

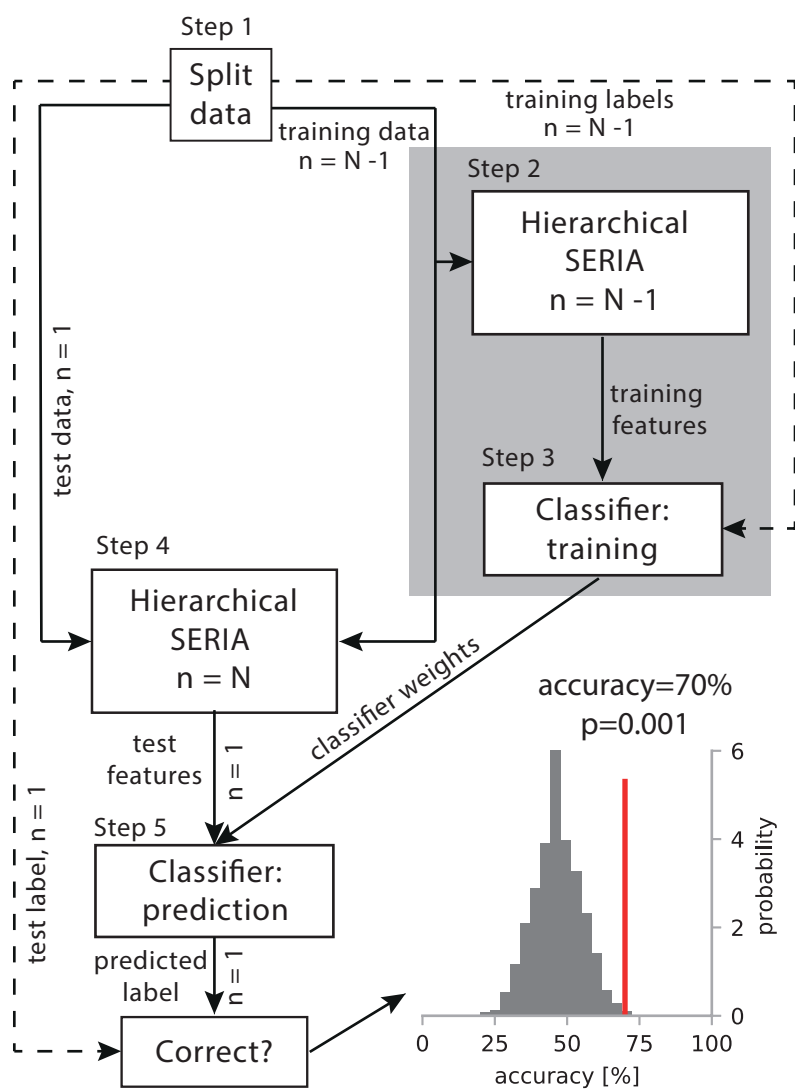

**Figure 5: Prediction of drug labels with SERIA.** This figure summarizes the classification procedure. **Step 1.** Data from  $N=90$  subjects were split into test and training sets leaving one subject out at each iteration. **Step 2.** To generate training features, the SERIA model was fitted to data from  $N-1$  subjects. **Step 3.** A gradient boosting classifier was trained on the SERIA parameter estimates using the drug labels from the previous step. **Step 4.** Test features were generated by fitting SERIA to data from all  $N$  subjects. **Step 5.** Weights from classifiers trained on  $N-1$  subjects were used to predict the drug label of the left-out subjects. This resulted in a predictive accuracy of 70% (95% CI[61,79]),  $p=0.001$ . The histogram in the bottom right shows the accuracies using randomly permuted drug labels. The red line illustrates the true accuracy. This splitting of the data assured that the test data could not influence the training of the classifier in any way.



## 353 **Discussion**

354 This study was motivated by the longstanding observation that aberrant  
355 neuromodulatory signaling might underlie the pathophysiology in schizophrenia  
356 (56-59). Hence, non-invasive readouts of neuromodulatory processes in patients  
357 might be of clinical relevance (4). A first test of the feasibility of such readouts  
358 can be obtained from pharmacological studies in healthy volunteers using a  
359 paradigm with consistently altered behavior in schizophrenia and with  
360 hypothesized links to potential changes in neuromodulatory transmission. The  
361 antisaccade paradigm fulfills these criteria. We have thus studied changes of its  
362 key cognitive subcomponents – in particular, inhibitory control and action  
363 selection – under pharmacological manipulations of DA and ACh.

364 With this goal in mind, we investigated the effect of a pro-dopaminergic  
365 (levodopa) and a pro-cholinergic (galantamine) drug on inhibition and action  
366 selection during the antisaccade task. Traditional behavioral metrics revealed  
367 several significant effects of these drugs. A more fine-grained analysis was  
368 possible through computational modeling, which indicated that levodopa altered  
369 action selection. Levodopa also increased the number of inhibition failures,  
370 although this effect was not significant. In other words, levodopa mainly  
371 enhanced the decision process between competing voluntary actions, without  
372 reliably affecting the inhibition of reflexive saccades. Higher action selection  
373 accuracy came at the cost of higher RT.

374 Galantamine affected both action selection and inhibitory control. Specifically,  
375 voluntary actions were facilitated by galantamine: RT were lower compared to  
376 placebo. Galantamine also improved the inhibition of reflexive actions at lower  
377 doses but had the opposite effect at higher levels. Thus, contrary to commonly  
378 held hypotheses (9; 10), dopaminergic neuromodulation affected action  
379 selection rather than inhibitory control. However, cholinergic neuromodulation  
380 strongly affected inhibitory control. Notably, these effects were specific enough  
381 to allow for identifying the administered drug on a subject-by-subject basis with  
382 reasonable accuracy. This suggests the potential for a future translation of our  
383 method into clinical applications.

384 In the following, we discuss our findings in relation to levodopa, galantamine,  
385 and possible clinical applications.

### 386 *Effects of levodopa*

387 Although levodopa has been used widely in translational research (60), it has not  
388 been studied systematically in the antisaccade task (but see (61; 62)).

389 Nevertheless, it has been hypothesized that increased tonic DA levels in the BG  
390 impair inhibitory control, which should explain the deficits observed in  
391 schizophrenia (9; 10).

392 According to SERIA, levodopa did not significantly alter the inhibition of reflexive  
393 saccades. However, there was a trend towards more inhibition failures in the  
394 levodopa condition. Previous studies have also failed to find changes in stop-  
395 signal RT under levodopa compared to placebo (63; 64), suggesting that  
396 increased tonic DA might have a limited effect on response inhibition.

397 Intriguingly, modeling demonstrated that levodopa influenced action selection  
398 in two ways: It reduced the probability of errors in selecting voluntary actions  
399 (choice errors), and it increased the latency of this type of actions. These effects  
400 were not restricted to antisaccades but extended to voluntary prosaccades and to  
401 corrective antisaccades. Thus, the effects of levodopa were most prominent in  
402 action selection and not in inhibitory control.

403 Prefrontal areas represent voluntary cue-action mappings in the antisaccade task  
404 (69; 70) and possibly implement the decision processes responsible for them (17;  
405 65). In these regions, low-dose DA1 receptor mediated inhibition might induce  
406 stronger network stability (66) reducing (choice) ER and RT, while not affecting  
407 inhibitory control. This possibility is also supported by our finding that levodopa  
408 reduced choice errors on prosaccade trials at lower doses, while it increased the  
409 ER at higher doses (Fig. 4A), suggesting that excessive DA impairs voluntary  
410 action selection.

411 In summary, the main effect of levodopa was to slow down voluntary saccades,  
412 which led to fewer choice errors. From a modeling perspective, this suggests that  
413 levodopa promoted a speed/accuracy tradeoff, by increasing the latency of  
414 voluntary responses, and thus allowing for more evidence to accumulate. By  
415 contrast, there was no significant effect on the inhibition of reflexive saccades.  
416 Nevertheless, our analysis cannot rule out that DA affects inhibitory control in  
417 the antisaccade task.

#### 418 *Effects of galantamine*

419 While the effects of nicotine on antisaccades have been investigated previously  
420 (25-34; 67; 68), to our knowledge, this is the first antisaccade study applying a  
421 more general pro-cholinergic drug (as an AChE inhibitor, galantamine raises ACh  
422 levels in general). Our findings replicate previous studies in which nicotine was  
423 found to reduce antisaccade RT (25; 27; 28; 30; 33).

424 In addition to the effect on voluntary responses, galantamine also affected  
425 inhibition failure probability in a dose-dependent fashion. At a high dose,  
426 galantamine had a deleterious effect, whereas at more moderate levels, it  
427 improved performance. A comparable effect was reported previously (69), and it  
428 agrees with dose-dependent effects observed in vitro (48) and in vivo in rodents  
429 (70). In patients with schizophrenia, galantamine at high doses (32mg/day)  
430 impairs inhibitory control (71).

431 Although deficits on the antisaccade task have been related to DA dysregulation  
432 in the BG, the BG are also strongly modulated by cholinergic processes, due to  
433 local cholinergic interneurons and afferent projections from cholinergic nuclei  
434 (76). Our results suggest that cholinergic neuromodulation is also relevant to  
435 explain deficits in inhibitory control.

#### 436 *Opposite effects of levodopa and galantamine: Predictive classification*

437 One promising application of mathematical models in translational psychiatry  
438 concerns the development of *computational assays* that can generate single-  
439 subject predictions (41). Our results indicate that the effects of galantamine and  
440 levodopa could be discriminated based on SERIA parameter estimates obtained  
441 from eye movements during the antisaccade task. To our knowledge, this  
442 constitutes the first demonstration that antisaccade behavior can be used to make  
443 statements about neuromodulation in individual subjects. Because antisaccade  
444 performance can be easily measured in clinical settings and is robustly impaired  
445 in schizophrenia, the combination of SERIA with machine learning might find  
446 utility for translational applications in schizophrenia research. Specifically, if the  
447 accuracy of our approach were further increased, it could help identify clinically  
448 relevant subgroups with different abnormalities in neuromodulation, as  
449 postulated by the dysconnection hypothesis of schizophrenia (4-6). If successful,  
450 a computational assay of this sort might eventually contribute to procedures for  
451 differential diagnostics and aid individual treatment recommendations. The  
452 limitations and prospects of this approach need to be evaluated in future studies.

## 453 **Acknowledgements**

454 This work was supported by the René and Susanne Braginsky Foundation (KES)  
455 and the University of Zurich (KES).

## 456 **Conflicts of interest**

457 Eduardo A. Aponte reports no conflict of interest. Dario Schoebi reports no  
458 conflict of interest. Jakob Heinzle reports no conflict of interest. Klaas E. Stephan  
459 reports no conflict of interest.

## 460 **References**

- 461 1. Buckley PF, Miller BJ (2017): Personalized medicine for schizophrenia. *NPJ*  
462 *Schizophr.* 3: 2.
- 463 2. Case M, Stauffer VL, Ascher-Svanum H, Conley R, Kapur S, Kane JM, *et al.*  
464 (2011): The heterogeneity of antipsychotic response in the treatment of  
465 schizophrenia. *Psychol Med.* 41: 1291–1300.
- 466 3. Stephan KE, Bach DR, Fletcher, P. C., Flint J, Frank MJ, Friston KJ, *et al.*  
467 (2016): Charting the landscape of priority problems in psychiatry, part 1:  
468 classification and diagnosis. *Lancet Psychiatry.* 3: 77–83.
- 469 4. Stephan KE, Baldeweg T, Friston KJ (2006): Synaptic plasticity and  
470 dysconnection in schizophrenia. *Biol Psychiatry.* 59: 929–939.
- 471 5. Stephan KE, Friston KJ, Frith CD (2009): Dysconnection in schizophrenia:  
472 from abnormal synaptic plasticity to failures of self-monitoring. *Schizophr*  
473 *Bull.* 35: 509–527.
- 474 6. Friston K, Brown HR, Siemerikus J, Stephan KE (2016): The dysconnection  
475 hypothesis (2016). *Schizophr Res.* 176: 83–94.
- 476 7. Heinzle J, Aponte EA, Stephan KE (2016): Computational models of eye  
477 movements and their application to schizophrenia. *Current Opinion in*  
478 *Behavioral Sciences.* 11: 21–29.
- 479 8. Munoz DP, Everling S (2004): Look away: the anti-saccade task and the  
480 voluntary control of eye movement. *Nat Rev Neurosci.* 5: 218–228.
- 481 9. Matsuda T, Matsuura M, Ohkubo T, Ohkubo H, Matsushima E, Inoue K, *et al.*  
482 (2004): Functional MRI mapping of brain activation during visually guided  
483 saccades and antisaccades: cortical and subcortical networks. *Psychiatry*  
484 *Res.* 131: 147–155.
- 485 10. Wiecki TV, Frank MJ (2013): A computational model of inhibitory control  
486 in frontal cortex and basal ganglia. *Psychol Rev.* 120: 329–355.
- 487 11. Isoda M, Hikosaka O (2011): Cortico-basal ganglia mechanisms for  
488 overcoming innate, habitual and motivational behaviors. *Eur J Neurosci.* 33:  
489 2058–2069.
- 490 12. Hikosaka O, Takikawa Y, Kawagoe R (2000): Role of the basal ganglia in  
491 the control of purposive saccadic eye movements. *Physiol Rev.* 80: 953–978.
- 492 13. Condy C, Rivaud-Pechoux S, Ostendorf F, Ploner CJ, Gaymard B (2004):  
493 Neural substrate of antisaccades: role of subcortical structures. *Neurology.*  
494 63: 1571–1578.
- 495 14. Guitton D, Buchtel HA, Douglas RM (1985): Frontal lobe lesions in man  
496 cause difficulties in suppressing reflexive glances and in generating goal-  
497 directed saccades. *Exp Brain Res.* 58: 455–472.
- 498 15. Pierrot-Deseilligny C, Rivaud S, Gaymard B, Agid Y (1991): Cortical control  
499 of reflexive visually-guided saccades. *Brain.* 114 ( Pt 3): 1473–1485.
- 500 16. Reuter B, Rakusan L, Kathmanna N (2005): Poor antisaccade performance  
501 in schizophrenia: an inhibition deficit? *Psychiatry Res.* 135: 1–10.
- 502 17. Everling S, Johnston K (2013): Control of the superior colliculus by the  
503 lateral prefrontal cortex. *Philos Trans R Soc Lond, B, Biol Sci.* 368:  
504 20130068.

- 505 18. Arango C, Garibaldi G, Marder SR (2013): Pharmacological approaches to  
506 treating negative symptoms: a review of clinical trials. *Schizophr Res.* 150:  
507 346–352.
- 508 19. Buchanan RW, Conley RR, Dickinson D, Ball MP, Feldman S, Gold JM,  
509 McMahon RP (2008): Galantamine for the treatment of cognitive  
510 impairments in people with schizophrenia. *Am J Psychiatry.* 165: 82–89.
- 511 20. Lieberman JA, Dunbar G, Segreti AC, Girgis RR, Seoane F, Beaver JS, *et al.*  
512 (2013): A randomized exploratory trial of an  $\alpha 7$  nicotinic receptor agonist  
513 (TC-5619) for cognitive enhancement in schizophrenia.  
514 *Neuropsychopharmacology.* 38: 968–975.
- 515 21. Conley RR, Boggs DL, Kelly DL, McMahon RP, Dickinson D, Feldman S, *et al.*  
516 (2009): The effects of galantamine on psychopathology in chronic stable  
517 schizophrenia. *Clin Neuropharmacol.* 32: 69–74.
- 518 22. Lindenmayer JP, Khan A (2011): Galantamine augmentation of long-acting  
519 injectable risperidone for cognitive impairments in chronic schizophrenia.  
520 *Schizophr Res.* 125: 267–277.
- 521 23. Umbricht D, Keefe RS, Murray S, Lowe DA, Porter R, Garibaldi G, Santarelli  
522 L (2014): A randomized, placebo-controlled study investigating the  
523 nicotinic  $\alpha 7$  agonist, RG3487, for cognitive deficits in schizophrenia.  
524 *Neuropsychopharmacology.* 39: 1568–1577.
- 525 24. Walling D, Marder SR, Kane J, Fleischhacker WW, Keefe RS, Hosford DA, *et al.*  
526 (2016): Phase 2 Trial of an Alpha-7 Nicotinic Receptor Agonist (TC-  
527 5619) in Negative and Cognitive Symptoms of Schizophrenia. *Schizophr*  
528 *Bull.* 42: 335–343.
- 529 25. Bowling AC, Donnelly JF (2010): Effect of nicotine on saccadic eye  
530 movement latencies in non-smokers. *Hum Psychopharmacol.* 25: 410–418.
- 531 26. Depatie L, O'Driscoll GA, Holahan AL, Atkinson V, Thavundayil JX, Kin NN,  
532 Lal S (2002): Nicotine and behavioral markers of risk for schizophrenia: a  
533 double-blind, placebo-controlled, cross-over study.  
534 *Neuropsychopharmacology.* 27: 1056–1070.
- 535 27. Ettinger U, Williams SC, Patel D, Michel TM, Nwaigwe A, Caceres A, *et al.*  
536 (2009): Effects of acute nicotine on brain function in healthy smokers and  
537 non-smokers: estimation of inter-individual response heterogeneity.  
538 *Neuroimage.* 45: 549–561.
- 539 28. Larrison AL, Briand KA, Sereno AB (2004): Nicotine improves antisaccade  
540 task performance without affecting prosaccades. *Hum Psychopharmacol.* 19:  
541 409–419.
- 542 29. Petrovsky N, Ettinger U, Quednow BB, Walter H, Schnell K, Kessler H, *et al.*  
543 (2012): Nicotine differentially modulates antisaccade performance in  
544 healthy male non-smoking volunteers stratified for low and high accuracy.  
545 *Psychopharmacology (Berl).* 221: 27–38.
- 546 30. Petrovsky N, Ettinger U, Quednow BB, Landsberg MW, Drees J, Lennertz L,  
547 *et al.* (2013): Nicotine enhances antisaccade performance in schizophrenia  
548 patients and healthy controls. *Int J Neuropsychopharmacol.* 16: 1473–1481.
- 549 31. Powell J, Dawkins L, Davis RE (2002): Smoking, reward responsiveness,  
550 and response inhibition: tests of an incentive motivational model. *Biol*  
551 *Psychiatry.* 51: 151–163.



- 552 32. Roos YBWEM, de Jongh FE, Crevits L (1995): The effects of smoking on  
553 anti-saccades: A study in regular smokers. *Neuro-Ophthalmology*. 15: 3–8.
- 554 33. Rycroft N, Hutton SB, Rusted JM (2006): The antisaccade task as an index  
555 of sustained goal activation in working memory: modulation by nicotine.  
556 *Psychopharmacology (Berl)*. 188: 521–529.
- 557 34. Rycroft N, Hutton SB, Clowry O, Groomsbridge C, Sierakowski A, Rusted  
558 JM (2007): Non-cholinergic modulation of antisaccade performance: a  
559 modafinil-nicotine comparison. *Psychopharmacology (Berl)*. 195: 245–253.
- 560 35. Schmechtig A, Lees J, Grayson L, Craig KJ, Dadhiwala R, Dawson GR, *et al.*  
561 (2013): Effects of risperidone, amisulpride and nicotine on eye movement  
562 control and their modulation by schizotypy. *Psychopharmacology (Berl)*.  
563 227: 331–345.
- 564 36. Mesulam MM, Mash D, Hersh L, Bothwell M, Geula C (1992): Cholinergic  
565 innervation of the human striatum, globus pallidus, subthalamic nucleus,  
566 substantia nigra, and red nucleus. *J Comp Neurol*. 323: 252–268.
- 567 37. Ding JB, Guzman JN, Peterson JD, Goldberg JA, Surmeier DJ (2010):  
568 Thalamic gating of corticostriatal signaling by cholinergic interneurons.  
569 *Neuron*. 67: 294–307.
- 570 38. Aponte EA, Schobi D, Stephan KE, Heinzle J (2017): The Stochastic Early  
571 Reaction, Inhibition, and late Action (SERIA) model for antisaccades. *PLoS*  
572 *Comput Biol*. 13: e1005692.
- 573 39. Aponte EA, Tschan DG, Heinzle J, Stephan KE (2018): Inhibition and late  
574 errors in the antisaccade task: Influence of task design. *Journal of*  
575 *Neurophysiology*. 270165.
- 576 40. Aponte EA, Stephan KE, Heinzle J (2019): Switch costs in inhibitory control  
577 and voluntary behaviour: A computational study of the antisaccade task.  
578 *Eur J Neurosci*.
- 579 41. Stephan KE, Schlagenhaut F, Huys QJ, Raman S, Aponte EA, Brodersen KH,  
580 *et al.* (2017): Computational neuroimaging strategies for single patient  
581 predictions. *Neuroimage*. 145: 180–199.
- 582 42. Aponte EA, Schobi D, Stephan KE, Heinzle J (2017): The Stochastic Early  
583 Reaction, Inhibition, and late Action (SERIA) model for antisaccades. *PLoS*  
584 *Comput Biol*. 13: e1005692.
- 585 43. Caldu X, Dreher JC (2007): Hormonal and genetic influences on processing  
586 reward and social information. *Ann N Y Acad Sci*. 1118: 43–73.
- 587 44. Koller WC, Rueda MG (1998): Mechanism of action of dopaminergic agents  
588 in Parkinson's disease. *Neurology*. 50: S11–14.
- 589 45. Texido L, Ros E, Martin-Satue M, Lopez S, Aleu J, Marsal J, Solsona C  
590 (2005): Effect of galantamine on the human alpha7 neuronal nicotinic  
591 acetylcholine receptor, the Torpedo nicotinic acetylcholine receptor and  
592 spontaneous cholinergic synaptic activity. *Br J Pharmacol*. 145: 672–678.
- 593 46. Maelicke A, Samochocki M, Jostock R, Fehrenbacher A, Ludwig J,  
594 Albuquerque EX, Zerlin M (2001): Allosteric sensitization of nicotinic  
595 receptors by galantamine, a new treatment strategy for Alzheimer's disease.  
596 *Biol Psychiatry*. 49: 279–288.
- 597 47. Santos MD, Alkondon M, Pereira EF, Aracava Y, Eisenberg HM, Maelicke A,  
598 Albuquerque EX (2002): The nicotinic allosteric potentiating ligand

- 599 galantamine facilitates synaptic transmission in the mammalian central  
600 nervous system. *Mol Pharmacol.* 61: 1222–1234.
- 601 48. Samochocki M, Hoffle A, Fehrenbacher A, Jostock R, Ludwig J, Christner C,  
602 *et al.* (2003): Galantamine is an allosterically potentiating ligand of  
603 neuronal nicotinic but not of muscarinic acetylcholine receptors. *J*  
604 *Pharmacol Exp Ther.* 305: 1024–1036.
- 605 49. Crevoisier C, Monreal A, Metzger B, Nilsen T (2003): Comparative single-  
606 and multiple-dose pharmacokinetics of levodopa and 3-O-methyldopa  
607 following a new dual-release and a conventional slow-release formulation  
608 of levodopa and benserazide in healthy volunteers. *Eur Neurol.* 49: 39–44.
- 609 50. Scott LJ, Goa KL (2000): Galantamine: a review of its use in Alzheimer's  
610 disease. *Drugs.* 60: 1095–1122.
- 611 51. Brodersen KH, Schofield TM, Leff AP, Ong CS, Lomakina EI, Buhmann JM,  
612 Stephan KE (2011): Generative embedding for model-based classification of  
613 fMRI data. *PLoS Comput Biol.* 7: e1002079.
- 614 52. Friedman JH (2001): Greedy function approximation: a gradient boosting  
615 machine. *Annals of statistics.* 1189–1232.
- 616 53. Chen T, Guestrin C (2016): Xgboost: A scalable tree boosting system.  
617 Presented at the Proceedings of the 22nd acm sigkdd international  
618 conference on knowledge discovery and data mining, pp 785–794.
- 619 54. Reilly JL, Frankovich K, Hill S, Gershon ES, Keefe RS, Keshavan MS, *et al.*  
620 (2014): Elevated antisaccade error rate as an intermediate phenotype for  
621 psychosis across diagnostic categories. *Schizophr Bull.* 40: 1011–1021.
- 622 55. Tatler BW, Hutton SB (2007): Trial by trial effects in the antisaccade task.  
623 *Exp Brain Res.* 179: 387–396.
- 624 56. Cohen JD, Servan-Schreiber D (1992): Context, cortex, and dopamine: a  
625 connectionist approach to behavior and biology in schizophrenia. *Psychol*  
626 *Rev.* 99: 45–77.
- 627 57. Howes OD, Kapur S (2009): The dopamine hypothesis of schizophrenia:  
628 version III--the final common pathway. *Schizophr Bull.* 35: 549–562.
- 629 58. Higley MJ, Picciotto MR (2014): Neuromodulation by acetylcholine:  
630 examples from schizophrenia and depression. *Curr Opin Neurobiol.* 29: 88–  
631 95.
- 632 59. Tandon R, Greden JF (1989): Cholinergic hyperactivity and negative  
633 schizophrenic symptoms. A model of cholinergic/dopaminergic interactions  
634 in schizophrenia. *Arch Gen Psychiatry.* 46: 745–753.
- 635 60. Cools R (2006): Dopaminergic modulation of cognitive function-  
636 implications for L-DOPA treatment in Parkinson's disease. *Neurosci Biobehav*  
637 *Rev.* 30: 1–23.
- 638 61. Duka T, Lupp A (1997): The effects of incentive on antisaccades: is a  
639 dopaminergic mechanism involved? *Behav Pharmacol.* 8: 373–382.
- 640 62. Hood AJ, Amador SC, Cain AE, Briand KA, Al-Refai AH, Schiess MC, Sereno  
641 AB (2007): Levodopa slows prosaccades and improves antisaccades: an eye  
642 movement study in Parkinson's disease. *J Neurol Neurosurg Psychiatr.* 78:  
643 565–570.
- 644 63. Obeso I, Wilkinson L, Jahanshahi M (2011): Levodopa medication does not  
645 influence motor inhibition or conflict resolution in a conditional stop-signal  
646 task in Parkinson's disease. *Exp Brain Res.* 213: 435–445.



- 647 64. Overtoom CC, Verbaten MN, Kemner C, Kenemans JL, van Engeland H,  
648 Buitelaar JK, *et al.* (2003): Effects of methylphenidate, desipramine, and L-  
649 dopa on attention and inhibition in children with Attention Deficit  
650 Hyperactivity Disorder. *Behav Brain Res.* 145: 7–15.
- 651 65. Lo CC, Wang XJ (2016): Conflict Resolution as Near-Threshold Decision-  
652 Making: A Spiking Neural Circuit Model with Two-Stage Competition for  
653 Antisaccadic Task. *PLoS Comput Biol.* 12: e1005081.
- 654 66. Vijayraghavan S, Wang M, Birnbaum SG, Williams GV, Arnsten AF (2007):  
655 Inverted-U dopamine D1 receptor actions on prefrontal neurons engaged in  
656 working memory. *Nat Neurosci.* 10: 376–384.
- 657 67. Larrison-Faucher AL, Matorin AA, Sereno AB (2004): Nicotine reduces  
658 antisaccade errors in task impaired schizophrenic subjects. *Prog*  
659 *Neuropsychopharmacol Biol Psychiatry.* 28: 505–516.
- 660 68. Ettinger U, Faiola E, Kasparbauer AM, Petrovsky N, Chan RC, Liepelt R,  
661 Kumari V (2017): Effects of nicotine on response inhibition and interference  
662 control. *Psychopharmacology (Berl).* 234: 1093–1111.
- 663 69. Vossel S, Bauer M, Mathys C, Adams RA, Dolan RJ, Stephan KE, Friston KJ  
664 (2014): Cholinergic stimulation enhances Bayesian belief updating in the  
665 deployment of spatial attention. *J Neurosci.* 34: 15735–15742.
- 666 70. Woodruff-Pak DS, Vogel RW, Wenk GL (2001): Galantamine: effect on  
667 nicotinic receptor binding, acetylcholinesterase inhibition, and learning.  
668 *Proc Natl Acad Sci USA.* 98: 2089–2094.
- 669 71. Dyer MA, Freudenreich O, Culhane MA, Pachas GN, Deckersbach T, Murphy  
670 E, *et al.* (2008): High-dose galantamine augmentation inferior to placebo  
671 on attention, inhibitory control and working memory performance in  
672 nonsmokers with schizophrenia. *Schizophr Res.* 102: 88–95.
- 673
